# Supplementary material for: The Effectiveness of Convalescent Plasma for the Treatment of Novel Corona Virus Disease 2019: A Systematic Review and Meta-Analysis
Source: PubMed Central journal article supplement (PMC8502818; doi:10.3389/fmed.2021.641429), 2021-09-27

Figure 3A Sub-analysis of pooled odds ratios (ORs) in mortality according to severity

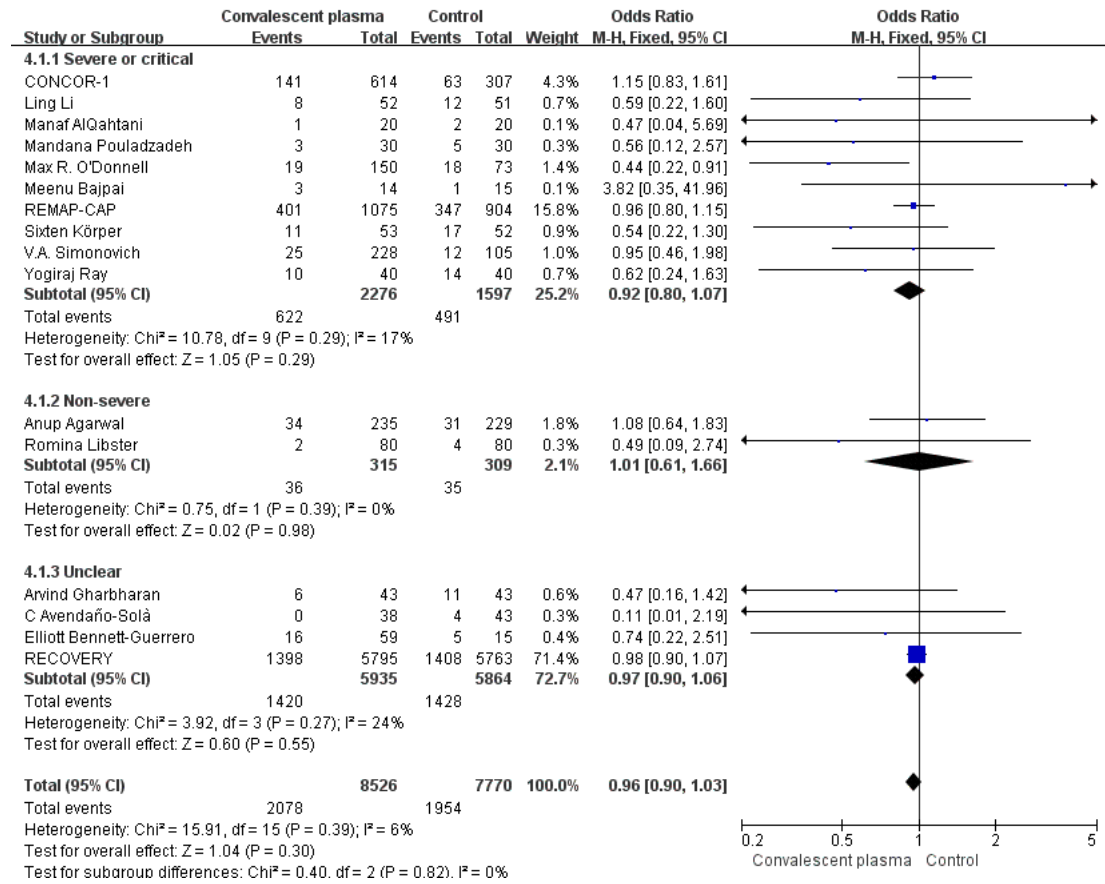

Weights are from fixed-effects analysis. Abbreviation: CI, confidence interval;

Figure 3B Sub-analysis of pooled odds ratios (ORs) in mortality according to infusion time (3 days)

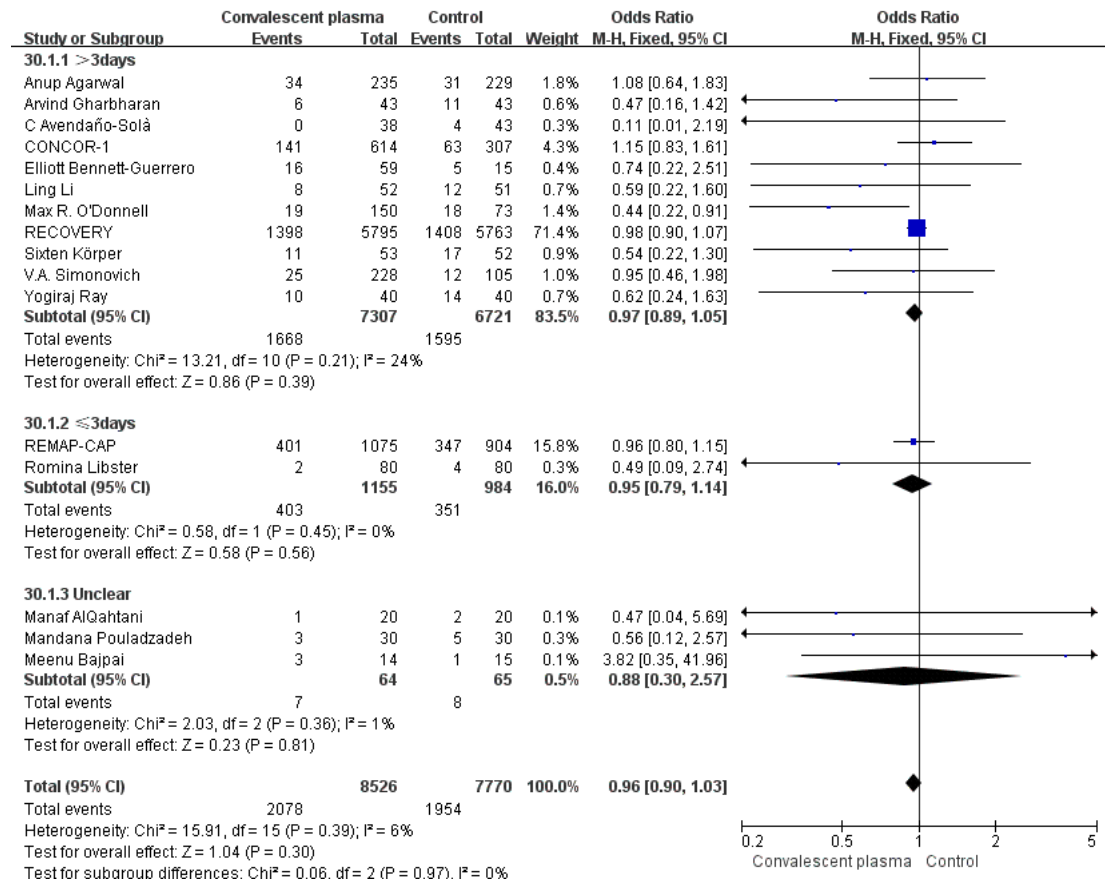

Weights are from fixed-effects analysis. Abbreviation: CI, confidence interval;

Figure 3C Sub-analysis of pooled odds ratios (ORs) in mortality according to infusion time (7 days)

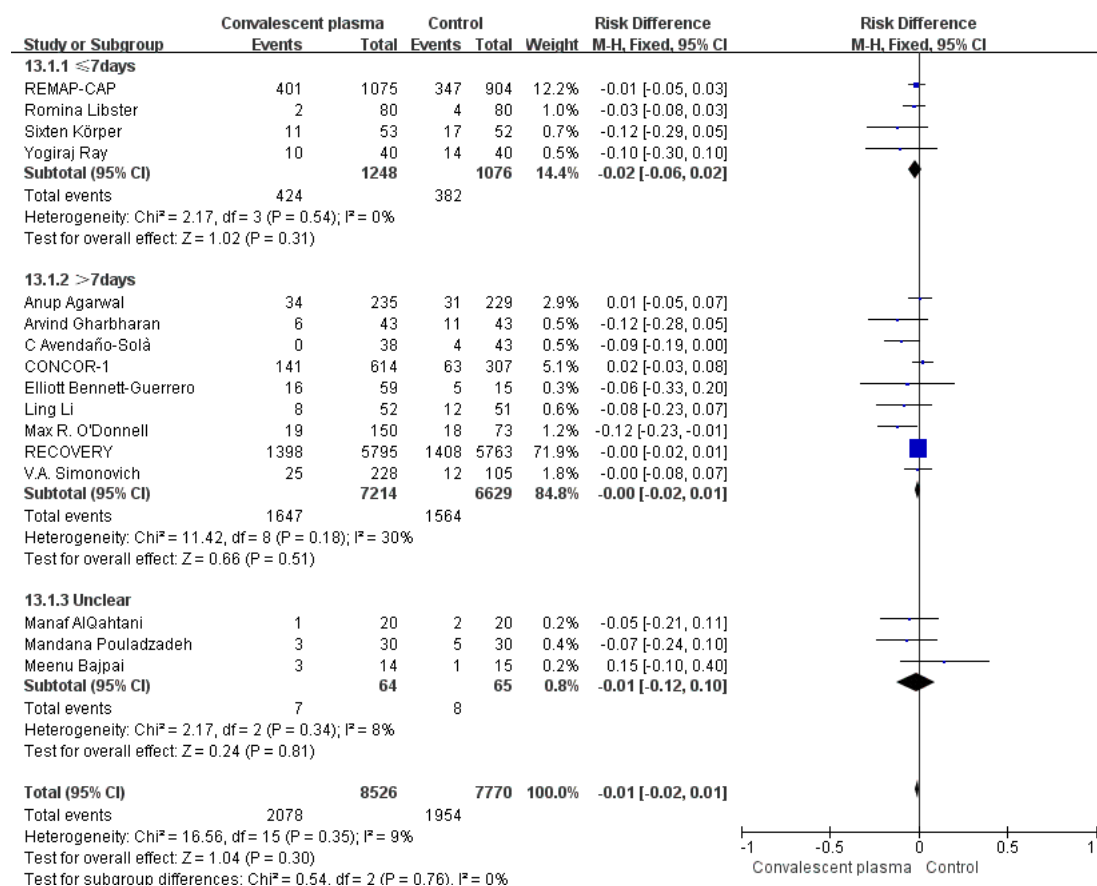

Weights are from fixed-effects analysis. Abbreviation: CI, confidence interval;

Figure 3D Sub-analysis of pooled odds ratios (ORs) in mortality according to age(65 years)

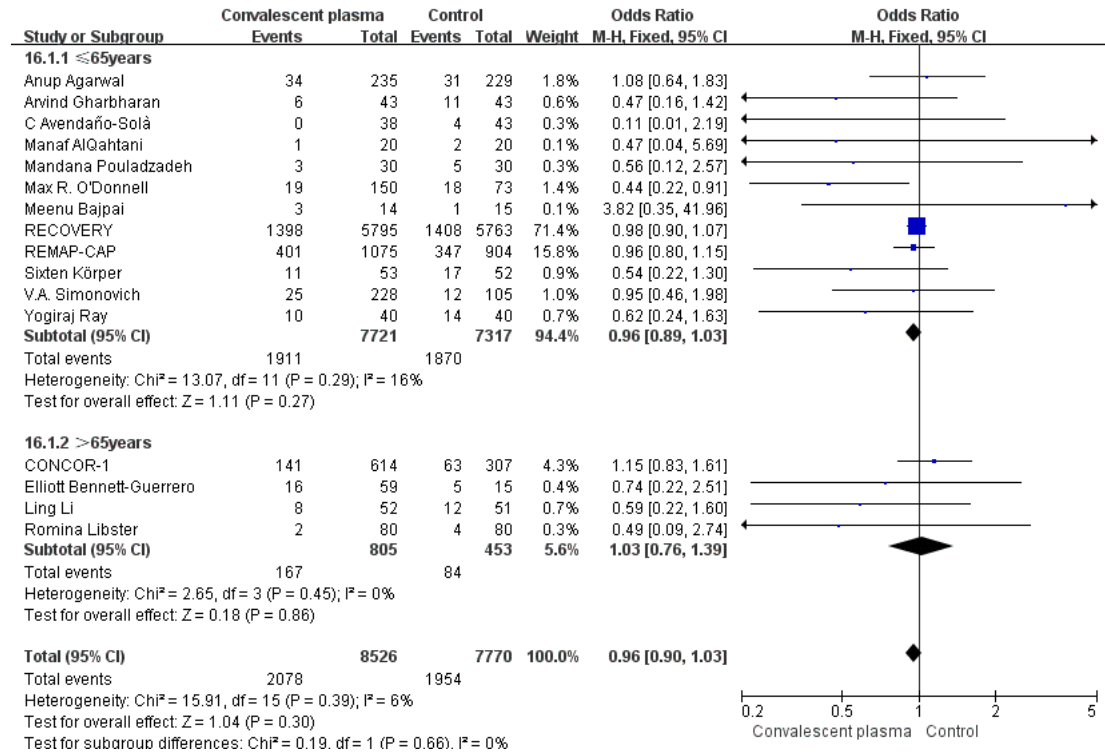

Weights are from fixed-effects analysis. Abbreviation: CI, confidence interval;

Figure 3E Sub-analysis of pooled odds ratios (ORs) in mortality according to volume of infusion(500ml)

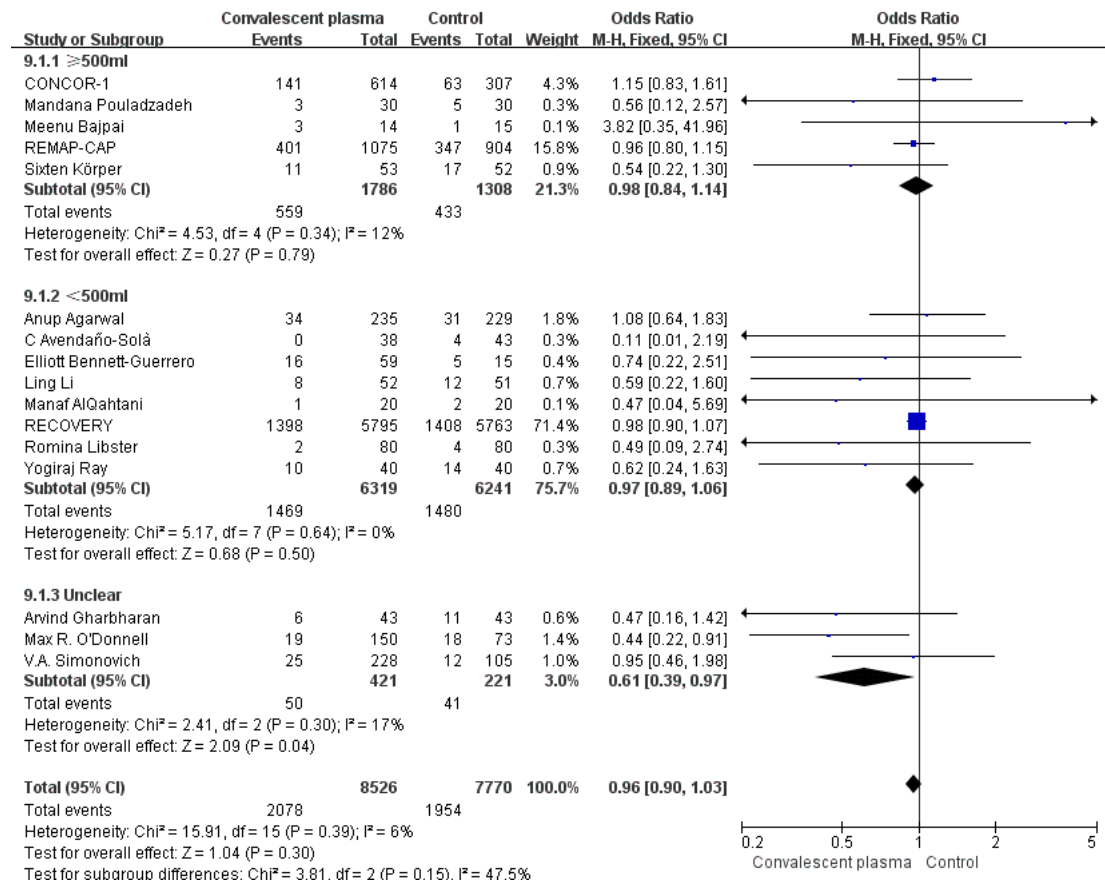

Weights are from fixed-effects analysis. Abbreviation: CI, confidence interval;

Figure 3F Sub-analysis of pooled odds ratios (ORs) in mortality according to volume of infusion(300ml)

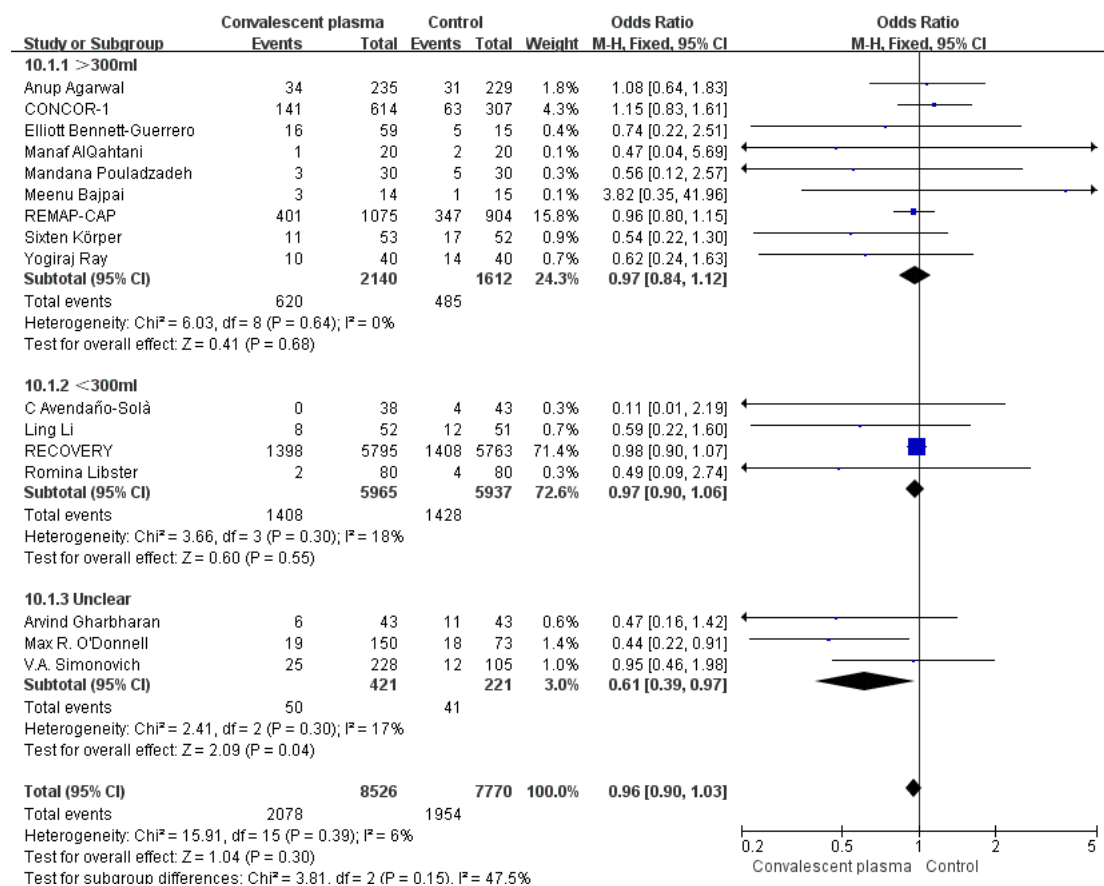

Weights are from fixed-effects analysis. Abbreviation: CI, confidence interval;

Figure 3G the funnel plot of mortality

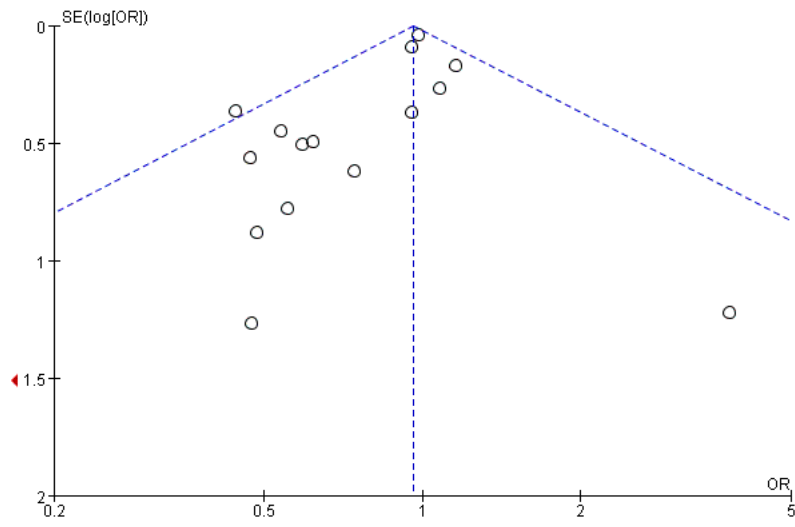

Figure 3H the Egger test in mortality

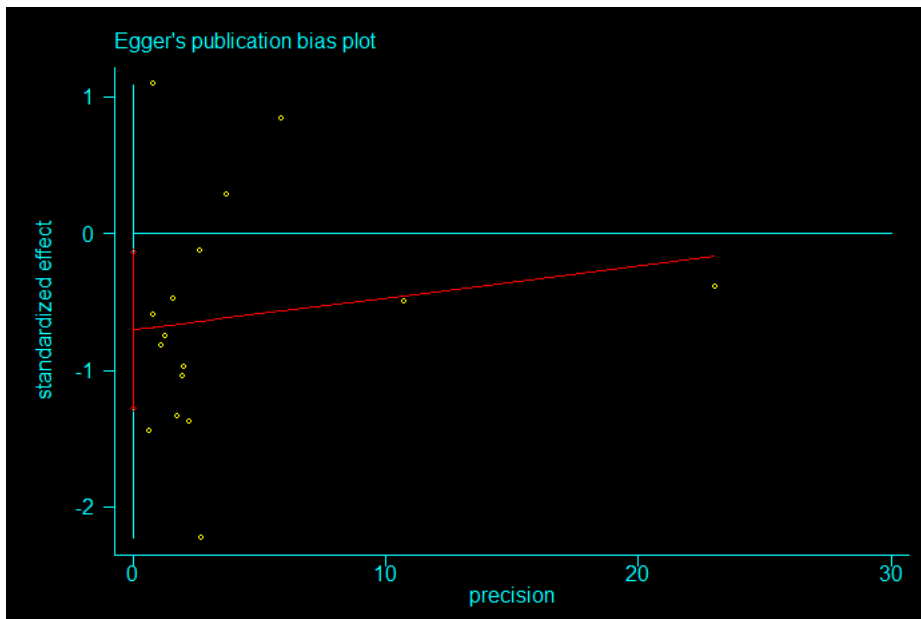

Figure 4B the funnel plot of mortality of 28-day

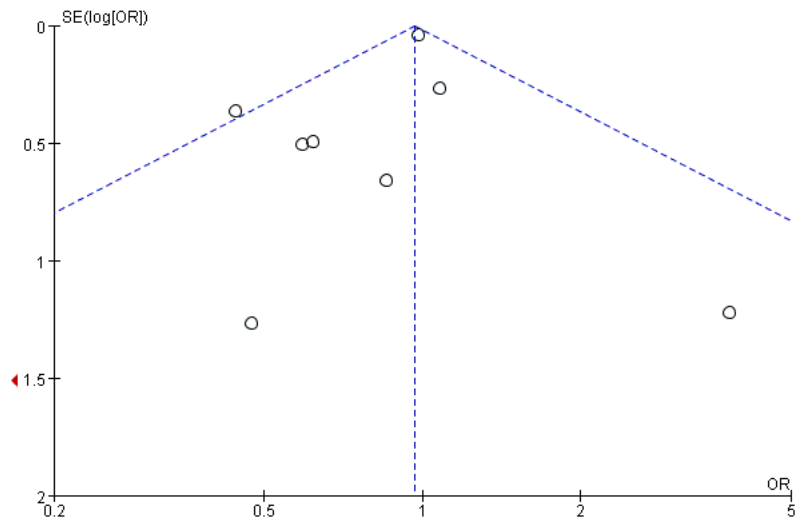

Figure 4C the Egger test in mortality of 28 day

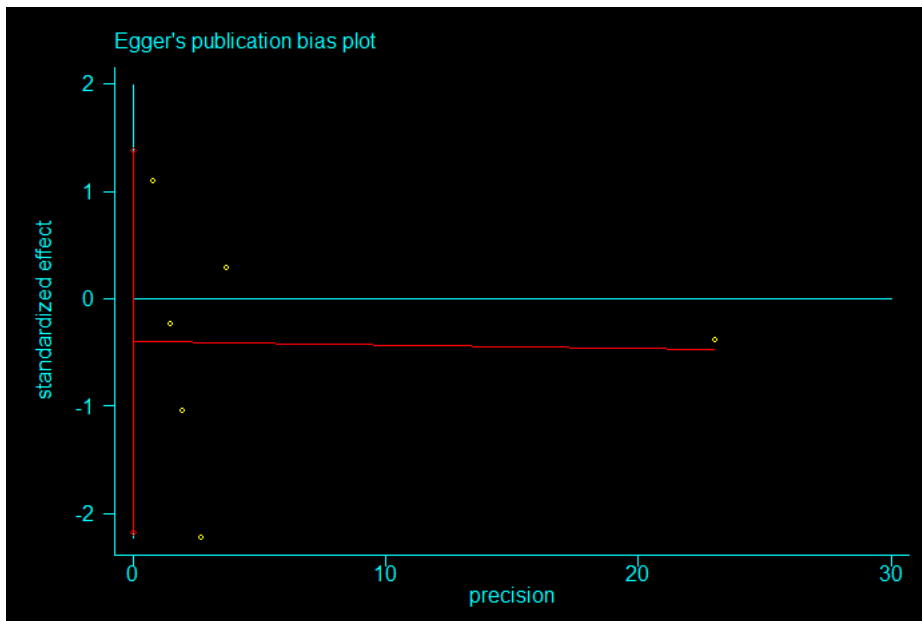



Figure 5A the funnel plot of hospital stay

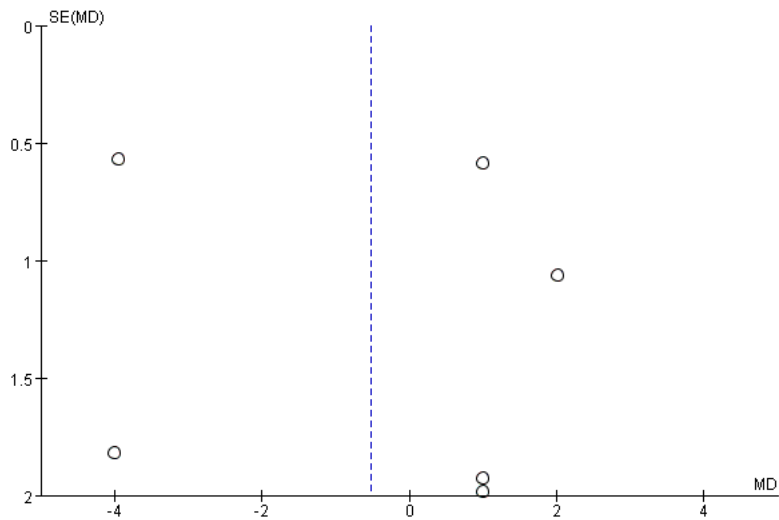

Figure 5B the Egger test in hospital stay

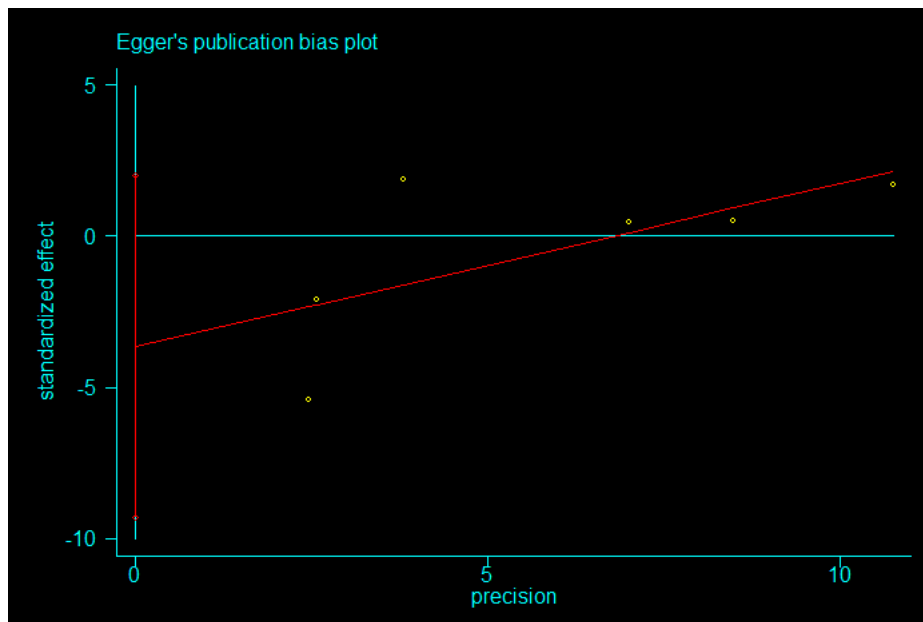

Figure 6A the funnel plot of the duration of ICU

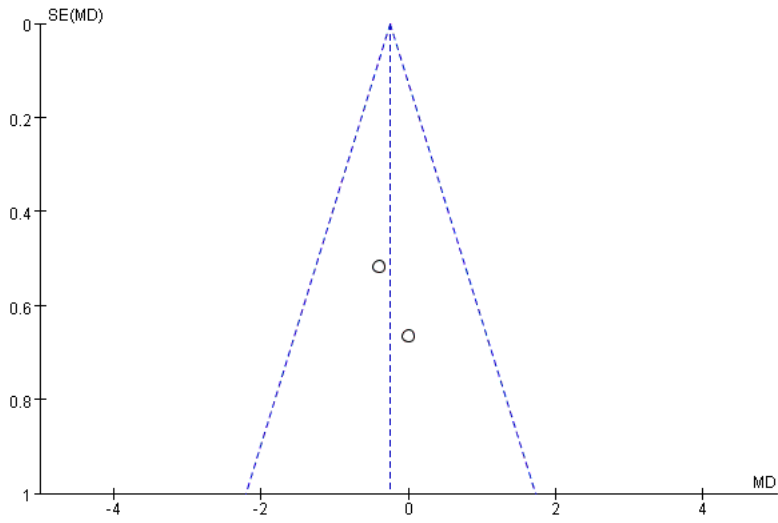

Figure 6B the Egger test in the duration of ICU

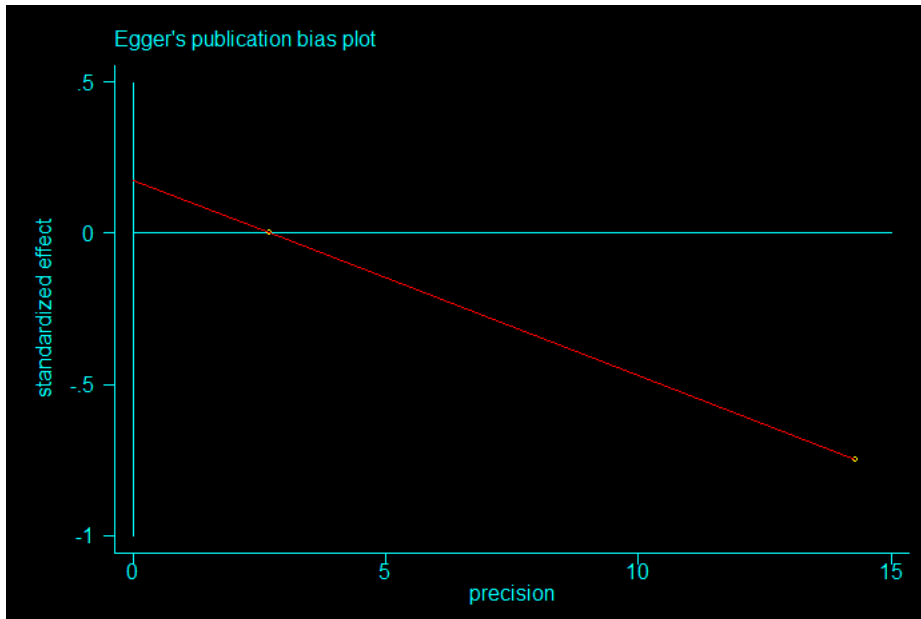

Figure 7A the funnel plot of the duration of MV

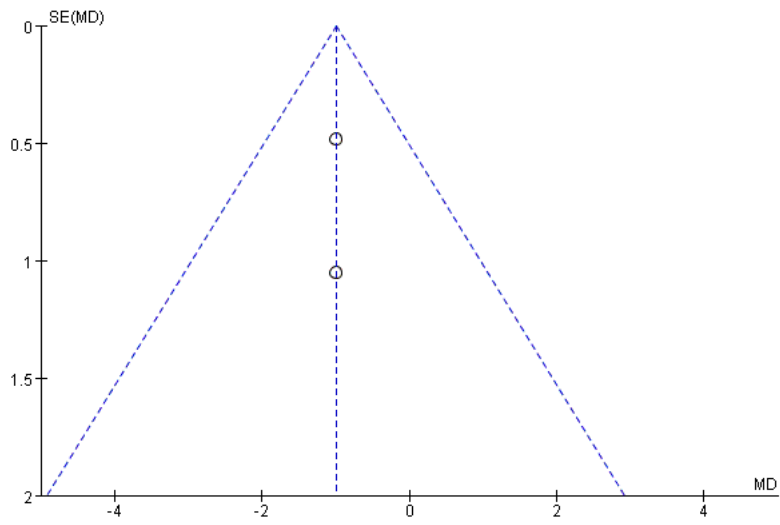

Figure 7B the Egger test in the duration of MV

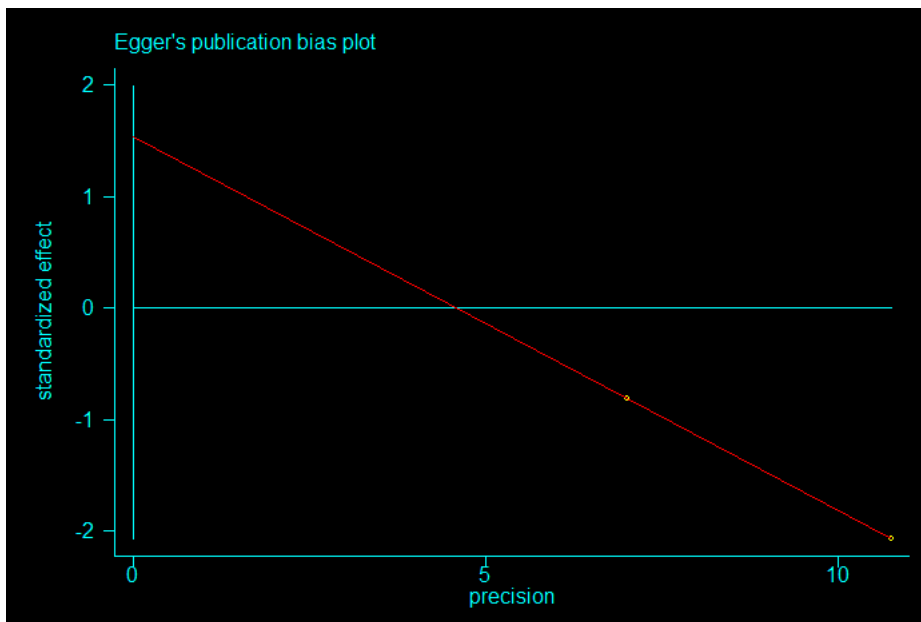

Figure 8A the funnel plot of the rate of ICU

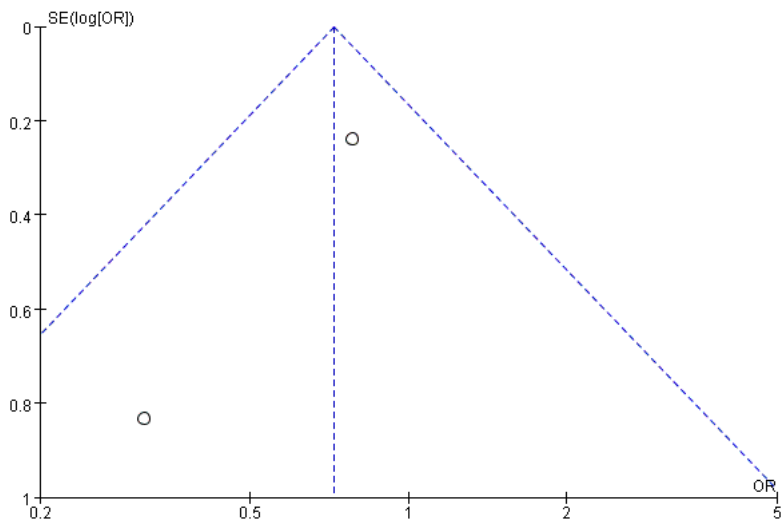

Figure 8B the Egger test in the rate of ICU

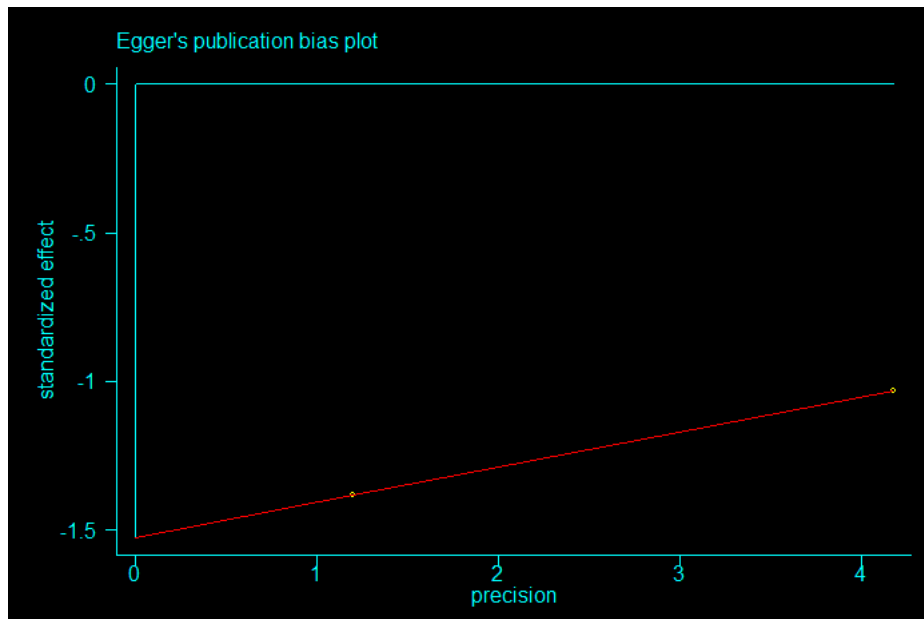

Figure 9A the funnel plot of the rate of mechanic ventilation

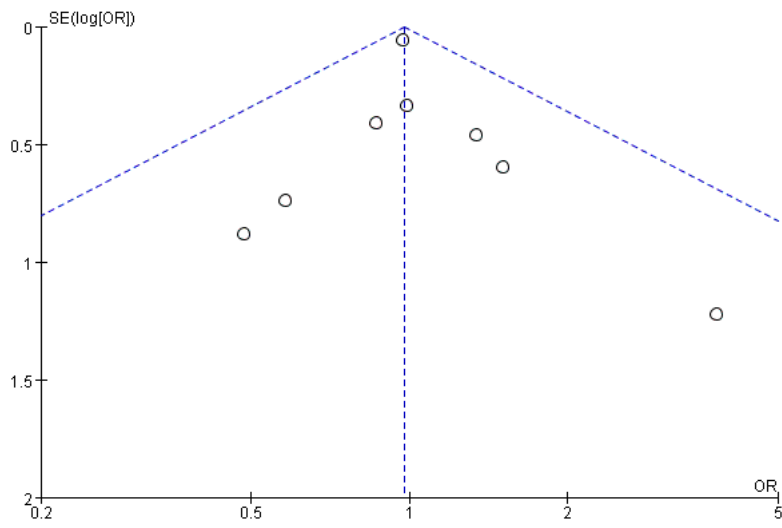

Figure 9B the Egger test in the rate of mechanic ventilation

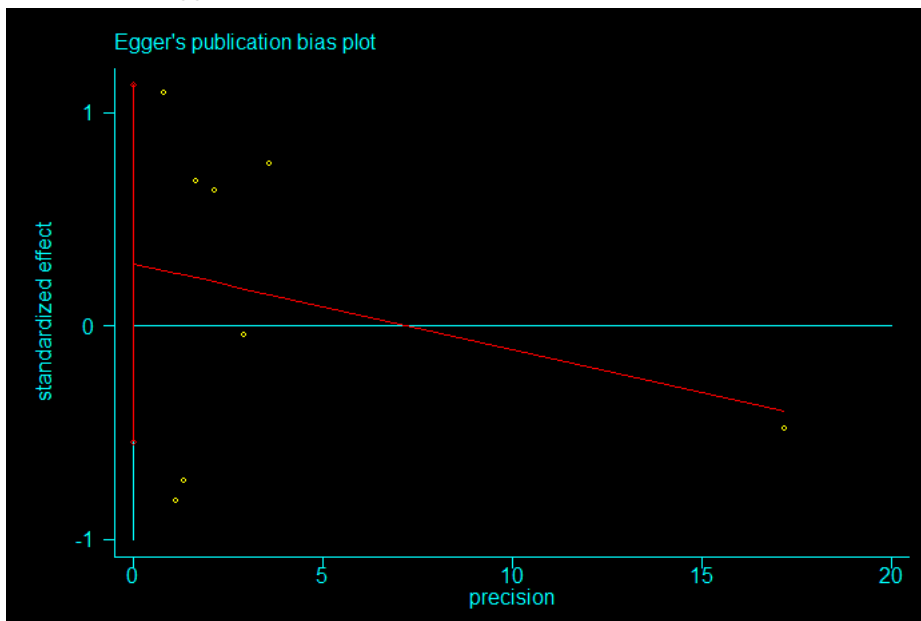

Supplement: Data_Sheet_1.pdf [file Data_Sheet_1.pdf]
